## RESEARCH ARTICLE

# NF- $\kappa$ B1 deficiency promotes macrophage-derived adrenal tumors but decreases neurofibromas in HTLV-I LTR-Tax transgenic mice

Xinxin Song<sup>1‡</sup>, Zhaoxia Qu<sup>1,2\*</sup>

**1** Department of Microbiology and Molecular Genetics, UPMC Hillman Cancer Center, University of Pittsburgh School of Medicine, Pittsburgh, PA, United States of America, **2** Department of Molecular Microbiology and Immunology, Hastings Center for Pulmonary Research, Norris Comprehensive Cancer Center, University of Southern California Keck School of Medicine, Los Angeles, CA, United States of America

‡ Current address: Department of Surgery, University of Texas Southwestern Medical Center, Dallas, Texas, United States of America

\* [Zhaoxia.Qu@med.usc.edu](mailto:Zhaoxia.Qu@med.usc.edu)

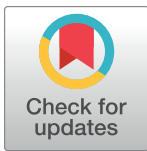

## OPEN ACCESS

**Citation:** Song X, Qu Z (2024) NF- $\kappa$ B1 deficiency promotes macrophage-derived adrenal tumors but decreases neurofibromas in HTLV-I LTR-Tax transgenic mice. PLoS ONE 19(5): e0303138. <https://doi.org/10.1371/journal.pone.0303138>

**Editor:** Edward William Harhaj, Penn State Health Milton S Hershey Medical Center, UNITED STATES

**Received:** January 19, 2024

**Accepted:** April 19, 2024

**Published:** May 9, 2024

**Copyright:** © 2024 Song, Qu. This is an open access article distributed under the terms of the [Creative Commons Attribution License](https://creativecommons.org/licenses/by/4.0/), which permits unrestricted use, distribution, and reproduction in any medium, provided the original author and source are credited.

**Data Availability Statement:** All relevant data are within the manuscript and its [Supporting Information](#) files.

**Funding:** This study is supported in part by the NIH National Institute of General Medical Sciences (NIGMS) grant R01 GM144890 (Z. Q.), NIH National Cancer Institute (NCI) R01 CA258614 (Z. Q.), American Cancer Society (ACS) Research Scholar grant RSG-19-166-01-TBG (Z. Q.), American Lung Association (ALA) Lung Cancer Discovery Award 821321 (Z. Q.), and Tobacco Related-Disease Research Program (TRDRP)

## Abstract

Human T-cell leukemia virus type I (HTLV-I) is an oncogenic virus whose infection can cause diverse diseases, most notably adult T-cell leukemia/lymphoma (ATL or ATLL), an aggressive and fatal malignancy of CD4 T cells. The oncogenic ability of HTLV-I is mostly attributed to the viral transcriptional transactivator Tax. Tax alone is sufficient to induce specific tumors in mice depending on the promoter used to drive Tax expression, thereby being used to understand HTLV-I tumorigenesis and model the tumor types developed in Tax transgenic mice. Tax exerts its oncogenic role predominantly by activating the cellular transcription factor NF- $\kappa$ B. Here, we report that genetic deletion of NF- $\kappa$ B1, the prototypic member of the NF- $\kappa$ B family, promotes adrenal medullary tumors but suppresses neurofibromas in mice with transgenic Tax driven by the HTLV-I Long Terminal Repeat (LTR) promoter. The adrenal tumors are derived from macrophages. Neoplastic macrophages also infiltrate the spleen and lymph nodes, causing splenomegaly and lymphadenopathy in mice. Nevertheless, the findings could be human relevant, because macrophages are important target cells of HTLV-I infection and serve as a virus reservoir *in vivo*. Moreover, the spleen, lymph nodes and adrenal glands are the most common sites of tumor cell infiltration in HTLV-I-infected patients. These data provide new mechanistic insights into the complex interaction between Tax and NF- $\kappa$ B, therefore improving our understanding of HTLV-I oncogenic pathogenesis. They also expand our knowledge and establish a new animal model of macrophage neoplasms and adrenal tumors.

Research Award T33IR6461 (Z. Q.). The funders had no role in the study design, data collection and analysis, decision to publish, or preparation of the manuscript.

**Competing interests:** The authors have declared that no competing interests exist.

## Introduction

Type I human T-cell leukemia virus (HTLV-I) infection can cause adult T-cell leukemia/lymphoma (ATL or ATLL) and several other diseases [1]. HTLV-I infection can also increase the risk of primary malignant neoplasms other than ATL [2]. HTLV-I encoded regulatory protein Tax is mainly responsible for the pathogenesis, particularly oncogenesis of HTLV-I. Deletion of Tax from HTLV-I genome leads to loss of its transformation ability, whereas Tax exhibits strong oncogenic ability both *in vitro* and *in vivo* [3,4]. Tax can transform rodent fibroblasts and immortalize human primary T cells *in vitro*, and Tax-transformed lymphoid cells and fibroblasts can form tumors in immunodeficient mice [5–9]. Tax-immortalized T lymphocytes show phenotypes similar to HTLV-I-transformed T cells [4,10]. Moreover, Tax transgenic mice develop tumors, and Tax-mediated T-cell lymphoma in mice closely resembles HTLV-I-induced ATL in human [4,11–18].

Tax exerts its oncogenic role largely through persistently activating nuclear factor- $\kappa$ B (NF- $\kappa$ B), a physiologically indispensable transcription factor whose persistent activation has been linked to nearly all cancer types and inflammation-associated diseases [18–21]. Tax mutants selectively defective in NF- $\kappa$ B activation lose the oncogenic ability [15]. In contrast, Tax mutants that are still able to activate NF- $\kappa$ B retain the transforming capability [15]. Not surprisingly, Tax has been used as a model to study NF- $\kappa$ B and associated pathogenesis, especially, tumorigenesis [4]. NF- $\kappa$ B is a family of transcription factors and consists of five structurally related members in mammalian: NF- $\kappa$ B1, NF- $\kappa$ B2, RelA (also known as p65), RelB and c-Rel [19]. The mechanisms by which Tax deregulates these important transcription factors have been well defined [4,22–26]. Notably, Tax acts as a super scaffold protein, recruiting numerous cellular factors to assemble a large functional complex termed Taxosome that is highly proficient in inducing activation of all five NF- $\kappa$ B members [4,27]. In line with the widely accepted role of NF- $\kappa$ B as the downstream mediator of Tax to drive tumorigenesis, genetic deletion of NF- $\kappa$ B2 significantly prevents the tumorigenesis/neurofibromas in Tax transgenic (*Tax*<sup>+</sup>) mice in which Tax expression is driven by the HTLV-I Long Terminal Repeat (LTR) promoter [28]. Except for NF- $\kappa$ B2, however, the roles of each individual member of the NF- $\kappa$ B family in Tax-mediated tumorigenesis are yet to be dissected. Particularly, genetic evidence is lacking.

Using the same *Tax*<sup>+</sup> mice as the model, here we identify an unexpected tumor suppressive function for NF- $\kappa$ B1. Remarkably, while suppressing neurofibromas, genetic deficiency of NF- $\kappa$ B1 promotes immortalization of Tax-expressing macrophages and causes massive infiltration of neoplastic macrophages into the spleen, lymph nodes and adrenal glands, resulting in splenomegaly, lymphadenopathy and adrenomegaly in mice. In addition to advancing our understanding of the complex interaction of NF- $\kappa$ B and Tax in driving tumorigenesis, these studies provide the first evidence revealing that adrenal medullary tumors may be derived from macrophages. They also provide a novel animal model of macrophage neoplasms and adrenal tumors.

## Results

### Induction of adrenal medullary tumors in *Tax*<sup>+</sup> mice by NF- $\kappa$ B1 deletion

To determine the role of NF- $\kappa$ B1 in Tax-mediated tumorigenesis, we generated *Nfkb1*<sup>-/-</sup>/*Tax*<sup>+</sup> mice in which the *Nfkb1* gene is genetically deleted. In line with previous studies showing the role of NF- $\kappa$ B in promoting neurofibromas driven by Tax (28), *Nfkb1* deletion inhibited neurofibroma development in *Tax*<sup>+</sup> mice (S1 Fig). Surprisingly, *Nfkb1* deletion led to adrenomegaly in about 50% of *Tax*<sup>+</sup> mice at the age of 25 weeks, whereas no adrenomegaly was observed

in  $Tax^+$  mice with intact *Nfkb1* by the 28-week age (Fig 1A and 1B). Hematoxylin and eosin (H&E) staining revealed a tumor histology in the medulla of the giant adrenal glands of *Nfkb1<sup>-/-</sup>/Tax<sup>+</sup>* mice (Fig 1C). It should be pointed out that *Nfkb1<sup>-/-</sup>* mice without *Tax* expression have normal adrenal glands and do not develop any detectable tumors under specific pathogen free conditions [29]. These data suggested that NF- $\kappa$ B1 deletion may promote adrenal medullary tumors in the  $Tax^+$  mice.

### Macrophage neoplasms in the adrenal glands of *Nfkb1<sup>-/-</sup>/Tax<sup>+</sup>* mice

Our immunohistochemistry (IHC) staining further revealed that the tumor cells in the adrenal glands of *Nfkb1<sup>-/-</sup>/Tax<sup>+</sup>* mice were positive for the immune cell marker CD45 and the

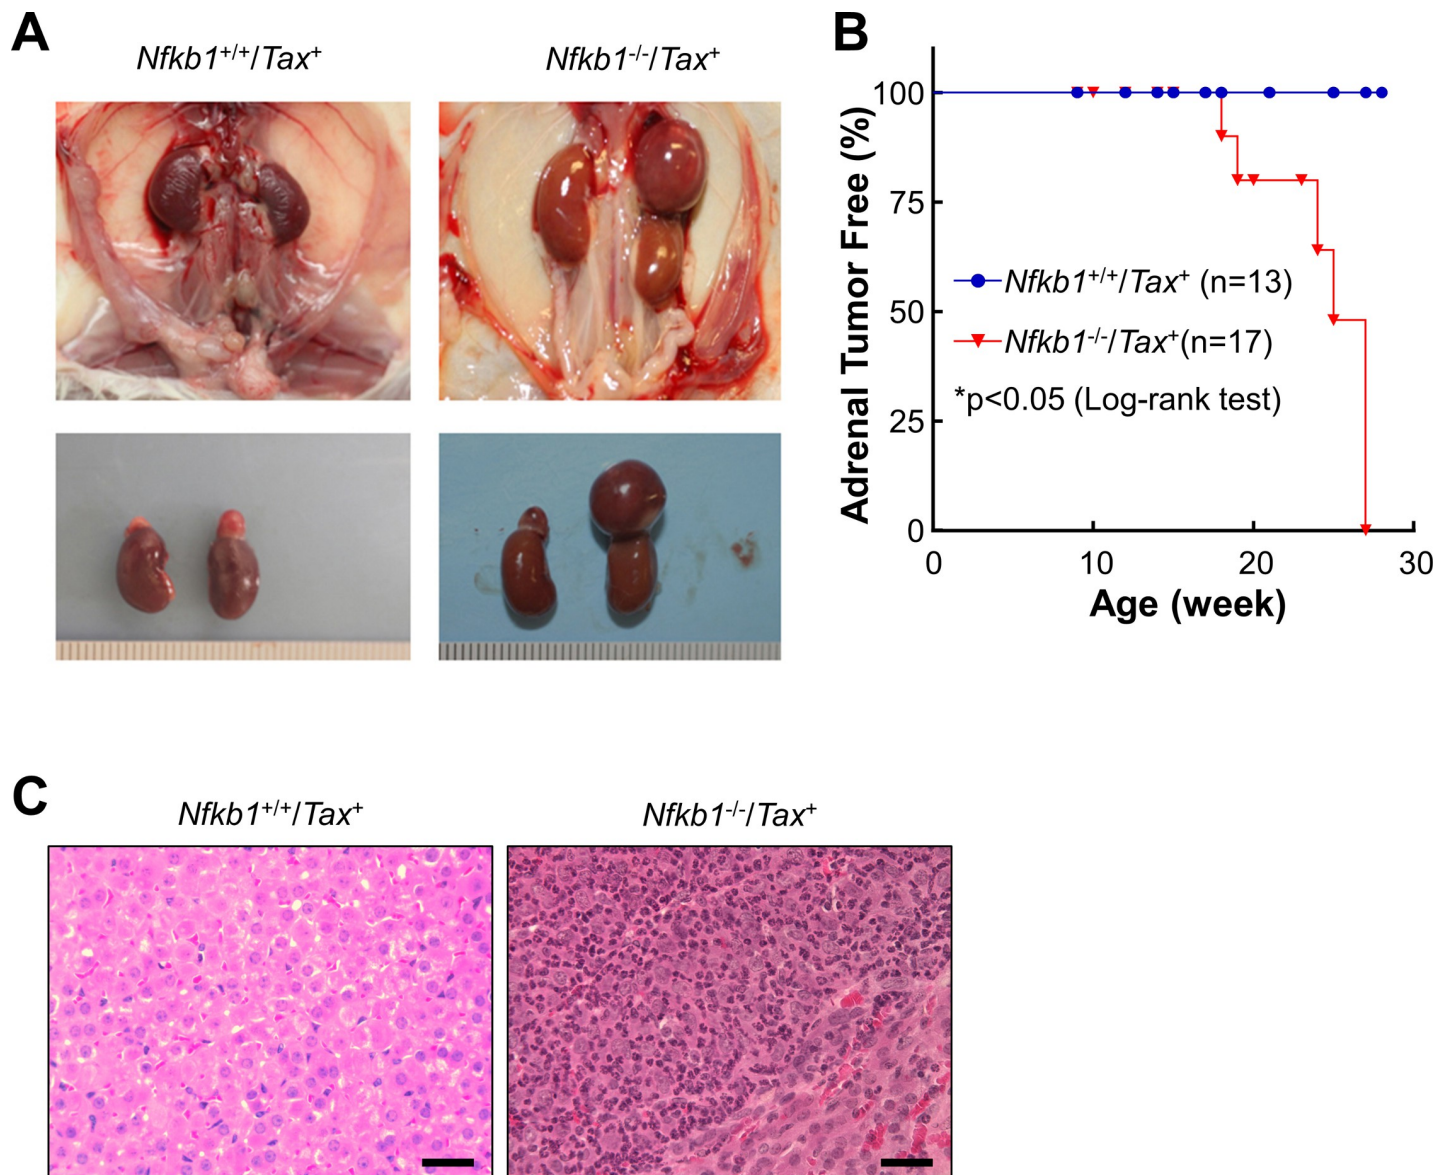

**Fig 1. NF- $\kappa$ B1 deletion promotes adrenal medullary tumors in  $Tax^+$  mice.** A. Representatives of  $Tax^+$  and *Nfkb1<sup>-/-</sup>/Tax<sup>+</sup>* mice at the age of 20 weeks showing induction of adrenomegaly in  $Tax^+$  mice by NF- $\kappa$ B1 deletion. B. Adrenomegaly incidence in  $Tax^+$  and *Nfkb1<sup>-/-</sup>/Tax<sup>+</sup>* mice. C. H&E staining showing adrenal medullary tumors in *Nfkb1<sup>-/-</sup>/Tax<sup>+</sup>* mice but not  $Tax^+$  mice at the age of 20 weeks. Scale bar: 40  $\mu$ m.

<https://doi.org/10.1371/journal.pone.0303138.g001>



macrophage marker F4/80 (Fig 2A), suggesting that macrophages were the cells of origin of the adrenal medullary tumors in the *Nfkb1*<sup>-/-</sup>/*Tax*<sup>+</sup> mice. To validate the data, we cultured *in vitro* the primary adrenal cells of *Tax*<sup>+</sup> and *Nfkb1*<sup>-/-</sup>/*Tax*<sup>+</sup> mice under the same normal culture conditions. Adrenal cells from *Tax*<sup>+</sup> mice started to die after 2 weeks of culture, and all cells died by 12 weeks (Fig 2B, left panels). In stark contrast, adrenal cells from *Nfkb1*<sup>-/-</sup>/*Tax*<sup>+</sup> mice kept growing after 12 weeks (Fig 2B, right panels), indicating that those cells were immortalized. Consistent with the IHC staining of the adrenal glands of *Nfkb1*<sup>-/-</sup>/*Tax*<sup>+</sup> mice, our flow cytometry analysis showed that the immortalized cells were macrophages (Fig 2C). These data suggested that NF- $\kappa$ B1 deletion induces macrophage neoplasms in the adrenal glands of the *Tax*<sup>+</sup> mice.

### Association of Tax expression with adrenal medullary tumors in *Nfkb1*<sup>-/-</sup>/*Tax*<sup>+</sup> mice

Given the powerful transforming ability of Tax [1,4], we compared both the RNA and protein levels of this viral oncoprotein in the adrenal glands of *Tax*<sup>+</sup> and *Nfkb1*<sup>-/-</sup>/*Tax*<sup>+</sup> mice. Our quantitative real-time reverse transcription-polymerase chain reaction (RT-qPCR) showed a significantly higher level of the Tax mRNA in the adrenal glands of *Nfkb1*<sup>-/-</sup>/*Tax*<sup>+</sup> mice (Fig 3A). Consistently, more Tax protein expression was detected in the adrenal glands of *Nfkb1*<sup>-/-</sup>/*Tax*<sup>+</sup> mice by IHC staining assays (Fig 3B). These data suggested that NF- $\kappa$ B1 deletion induces macrophage-derived adrenal tumors in the *Tax*<sup>+</sup> mice by inducing and/or maintaining expression of the Tax oncoprotein.

### Malignant lymphadenopathy and splenomegaly in *Nfkb1*<sup>-/-</sup>/*Tax*<sup>+</sup> mice

In line with previous studies [11,28], enlarged spleens and lymph nodes were observed in the *Tax*<sup>+</sup> mice compared to those matched wild type (WT) mice (Fig 4A). Remarkably, the spleen and lymph nodes of *Nfkb1*<sup>-/-</sup>/*Tax*<sup>+</sup> mice were even much bigger. More importantly, almost all cells from the lymph nodes of the *Tax*<sup>+</sup> mice died within 4 weeks of culture *in vitro*, whereas many lymph node cells from the *Nfkb1*<sup>-/-</sup>/*Tax*<sup>+</sup> mice survived and kept growing (Fig 4B). Immunofluorescent (IF) staining showed the survived cells were positive for macrophage-1 antigen (Mac-1, also known as macrophage integrin or integrin  $\alpha$ M $\beta$ 2), a macrophage marker

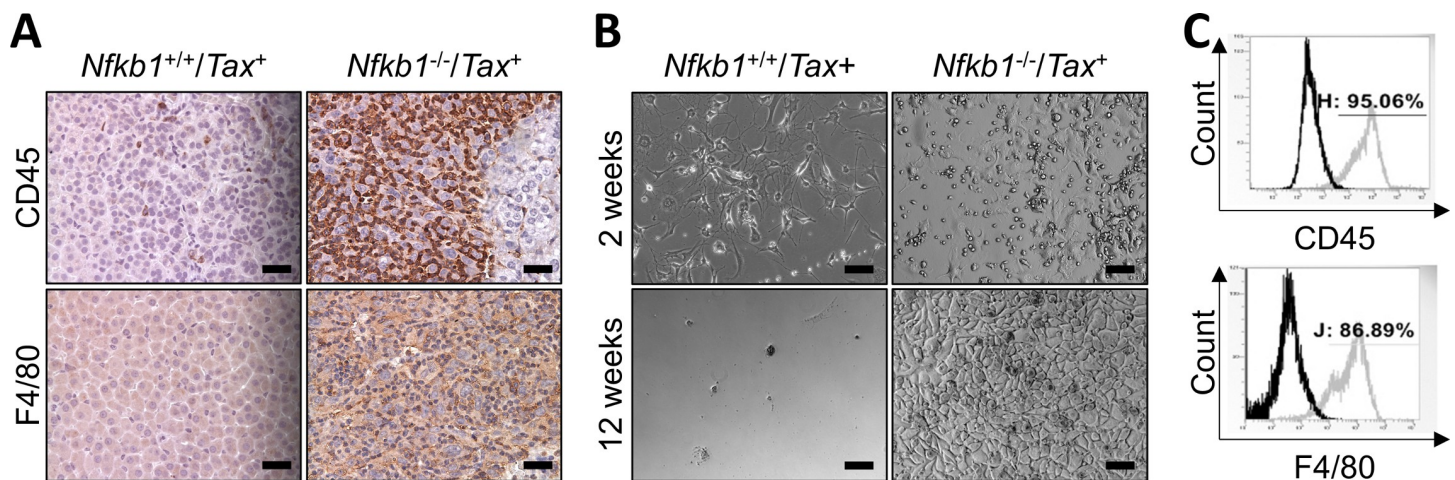

**Fig 2. Adrenal medullary tumors in *Nfkb1*<sup>-/-</sup>/*Tax*<sup>+</sup> mice are macrophage-derived.** A. IHC staining showing CD45<sup>+</sup> and F4/80<sup>+</sup> adrenal medullary tumors in *Nfkb1*<sup>-/-</sup>/*Tax*<sup>+</sup> mice at the age of 20 weeks. Scale bar: 40  $\mu$ m. B. *In vitro* culture showing the immortalization of primary adrenal gland cells of *Nfkb1*<sup>-/-</sup>/*Tax*<sup>+</sup> mice but not *Tax*<sup>+</sup> mice at the age of 20 weeks. Representative morphology of primary adrenal gland cells at 2 weeks and 12 weeks post *in vitro* culture were shown. Scale bar: 40  $\mu$ m. C. Flow cytometric analysis showing CD45<sup>+</sup> and F4/80<sup>+</sup> primary adrenal gland cells of *Nfkb1*<sup>-/-</sup>/*Tax*<sup>+</sup> mice 12 weeks post *in vitro* culture.

<https://doi.org/10.1371/journal.pone.0303138.g002>

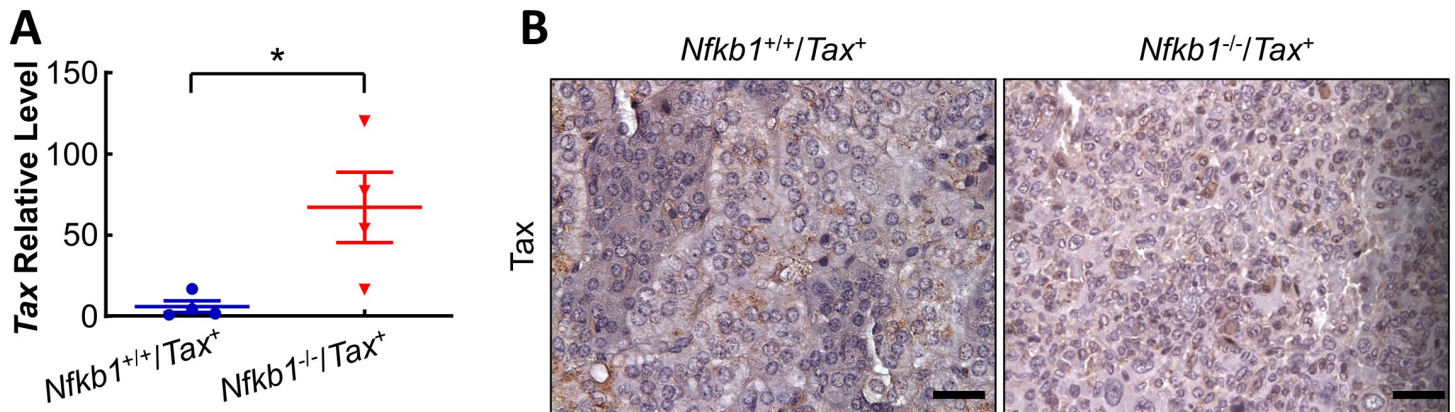

**Fig 3. Adrenal medullary tumors in *Nfkb1*<sup>-/-</sup>/*Tax*<sup>+</sup> mice are associated with elevated *Tax* expression.** A. RT-qPCR showing a significantly higher level of *Tax* mRNA in the adrenal glands of *Nfkb1*<sup>-/-</sup>/*Tax*<sup>+</sup> mice. *Nfkb1*<sup>-/-</sup>/*Tax*<sup>+</sup> and *Tax*<sup>+</sup> mice used were at the age of 16–25 weeks. *Tax* mRNA levels in each sample were normalized to the mRNA level of *Actin*. B. IHC staining showing more *Tax* protein expression in the adrenal glands of *Nfkb1*<sup>-/-</sup>/*Tax*<sup>+</sup> mice compared to those of *Tax*<sup>+</sup> mice at the same age of 20 weeks. Scale bar: 40 μm.

<https://doi.org/10.1371/journal.pone.0303138.g003>

(Fig 4C). These data suggested that NF-κB1 deletion not only promotes macrophage transformation but also cause massive infiltration of neoplastic macrophages into the lymph nodes and spleen of the *Tax*<sup>+</sup> mice.

## Discussion

Macrophages are important target cells and act as a virus reservoir of HTLV-I infection *in vivo* [30–33]. However, it remains unknown whether HTLV-I infection causes neoplastic transformation of macrophages, as it does for T-cell tumorigenesis. Similarly, whether *Tax* can immortalize macrophages is also unknown. The studies above clearly demonstrated, for the first time, that *Tax* is capable to transform macrophages into cancerous cells at least in mice in which

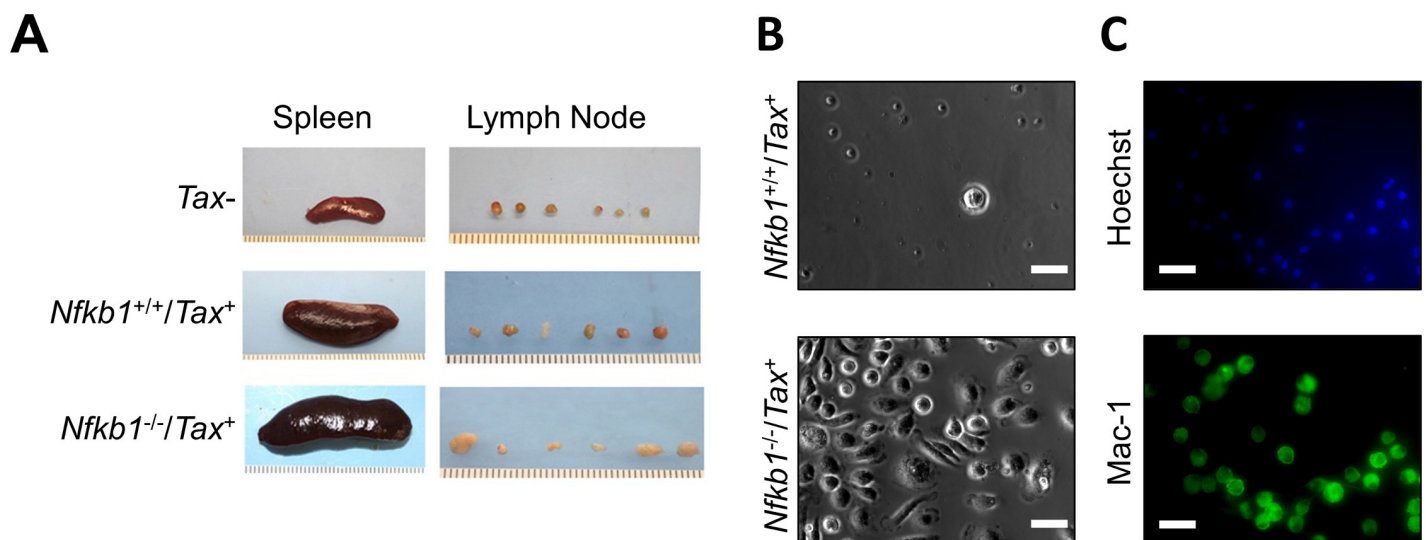

**Fig 4. *Nfkb1*<sup>-/-</sup>/*Tax*<sup>+</sup> mice have malignant lymphadenopathy and splenomegaly.** A. Representative spleens and lymph nodes of WT, *Tax*<sup>+</sup> and *Nfkb1*<sup>-/-</sup>/*Tax*<sup>+</sup> mice at the age of 20 weeks. B. *In vitro* culture showing the immortalization of primary lymph node cells from *Nfkb1*<sup>-/-</sup>/*Tax*<sup>+</sup> mice but not *Tax*<sup>+</sup> mice at the age of 20 weeks. Representative morphology of primary lymph node cells at 4 weeks post *in vitro* culture were shown. Scale bar: 40 μm. C. IF assays showing Mac-1<sup>+</sup> primary lymph node cells of *Nfkb1*<sup>-/-</sup>/*Tax*<sup>+</sup> mice 4 weeks post *in vitro* culture. Scale bar: 40 μm.

<https://doi.org/10.1371/journal.pone.0303138.g004>

NF- $\kappa$ B1 is genetically deleted. These studies also identify a previously unidentified tumor suppressive function of NF- $\kappa$ B in HTLV-I/Tax-mediated tumorigenesis.

Macrophage neoplasm in *Nfkb1*<sup>-/-</sup>/*Tax*<sup>+</sup> mice is a systemic malignancy that seems originally derived from adrenal glands, as adrenomegaly occurs earlier than lymphadenopathy and splenomegaly in the mice. It is noteworthy that adrenal glands have been identified as the primary tumor site in HTLV-I-infected patients, although it was proposed that tumor cells were derived from T cells in the adrenal glands [34]. However, the report failed to show that tumor cells expressed the T-cell marker CD3, CD4 or CD8, although tumor cells were positive for CD45 but not the B-cell marker CD20. It is thus of interest to examine whether the human primary adrenal tumors were derived from macrophages like those in *Nfkb1*<sup>-/-</sup>/*Tax*<sup>+</sup> mice. Of note, adrenal glands, lymph nodes and spleens are the most common infiltration sites of ATL cells [34,35]. While this would be true in most HTLV-I-infected patients, an extreme caution should be taken to ensure whether the infiltrated tumor cells are derived from T cells or macrophages in each clinical case.

One important function of NF- $\kappa$ B1 in suppressing Tax-mediated neoplastic transformation of macrophages is to selectively prevent Tax expression in macrophages, particularly those resided in adrenal glands, as *Nfkb1* deletion has no obvious effect on Tax expression in the spleen and lymph nodes of *Tax*<sup>+</sup> mice (S2 Fig). NF- $\kappa$ B1 is known to repress gene transcription, directly by the homodimer of its mature form p50 and/or indirectly by its precursor form p105 as the inhibitor of NF- $\kappa$ B [4]. Another potential mechanism may involve the NF- $\kappa$ B-independent function of p105 in stabilizing the kinase tumor progression locus 2 (Tpl2, also known as COT or MAP3K8) [29,36]. In this regard, the p105/Tpl2 axis has been demonstrated to be critical in lung cancer suppression [29]. Genetic deletion of NF- $\kappa$ B1 or Tpl2 promotes lung tumorigenesis in mouse models, whereas reconstitution of p105 or Tpl2 inhibits the tumorigenicity of NF- $\kappa$ B1 deficient lung tumor cells [29]. Nevertheless, the studies here provide another new layer of Tax inhibition by the host for the prevention of HTLV-I pathogenesis. In contrast to the well-defined mechanisms by which Tax hijacks cellular factors for pathogenesis, how most HTLV-I infected people sovereign Tax to keep asymptomatic is poorly understood. Especially, macrophage neoplasms have rarely been reported in peoples infected with HTLV-I. PDZ-LIM domain-containing protein 2 (PDLIM2), an essential tumor suppressor and immunomodulator, was the first cellular protein identified to negatively regulate Tax [20,37–46]. It directly binds to and promotes Tax ubiquitination and proteasomal degradation, thereby blocking HTLV-I/Tax-mediated tumorigenesis [37]. NF- $\kappa$ B1 is the second identified cellular factor that negatively regulates Tax. Interestingly, NF- $\kappa$ B1 suppresses Tax at the RNA level. So, the host uses complementary mechanisms to control this viral oncoprotein at both RNA and protein level.

In line with previous studies [11,12,28], *Tax*<sup>+</sup> mice develop neurofibromas in the ear, nose and tail. However, the genetic deletion of NF- $\kappa$ B1 fails to promote neurofibromas in *Tax*<sup>+</sup> mice. Instead, *Nfkb1* deletion significantly delays neurofibroma formation in the mice, indicating a promoting role of NF- $\kappa$ B1 in Tax-driven neurofibromatosis. Of note, genetic deletion of NF- $\kappa$ B2 also delays the development of neurofibroma in *Tax*<sup>+</sup> mice, though at a greater extent [28]. It should also be pointed out that no macrophage neoplasms are detected in *Nfkb2*<sup>-/-</sup>/*Tax*<sup>+</sup> mice [28]. These genetic studies demonstrate the mutually independent contribution of NF- $\kappa$ B1 and NF- $\kappa$ B2 in Tax-mediated neurofibromas. They also reveal a unique role for NF- $\kappa$ B1 in suppressing Tax expression and subsequent macrophage transformation and adrenal tumor formation.

In summary, the present studies demonstrate that NF- $\kappa$ B1 promotes neurofibromas but prevents the neoplastic transformation of macrophages and the formation of adrenal medullary tumors induced by the HTLV-I oncoprotein Tax. They provide new mechanistic insights



into the complex interactions of Tax with NF- $\kappa$ B and the host, therefore enlightening our understanding of HTLV-I pathogenesis. They also improve our knowledge and offer a new animal model of macrophage neoplasms and adrenal tumors.

## Materials and methods

### Animals

*Nfkb1*<sup>-/-</sup> and *Tax*<sup>+</sup> mice have been described before [28,29]. *Nfkb1*<sup>-/-</sup> mice were originally purchased from Jackson Laboratory (Bar Harbor, ME, USA). *Tax*<sup>+</sup> mice were generous gifts from J.E. Green [11]. *Nfkb1*<sup>-/-</sup> and *Tax*<sup>+</sup> mice were bred to generate *Nfkb1*<sup>-/-</sup>/*Tax*<sup>+</sup> mice. All animals were maintained under specific pathogen-free conditions and used according to protocols approved by the IACUC of the University of Pittsburgh and the University of Southern California. All research staff have completed laboratory animal care and use training before working with mice. Mouse health and behavior were monitored at least once per day. The mice with pain and distress were treated according to attending veterinarian's suggestions. Mice were euthanized at the indicated time points or when they exhibit severe difficulty in breathing or moving, significant weight loss (exceeding 20% of the body weight), moribund states of arousal, ulcerated or necrotic tumor, a visible tumor of size exceeding 1.5 cm in any dimension, or the combined volume of visible tumors exceeds 2000 mm<sup>3</sup> (2.0 cm<sup>3</sup>), or body condition score (BCS) reaches <2/5. Euthanasia was performed by CO<sub>2</sub> inhalation followed by cervical dislocation.

### Cell culture

Primary cells of adrenal glands and lymph nodes were cultured in Dulbecco modified Eagle medium (DMEM) supplemented with 10% fetal bovine serum (FBS) and 2 mM l-glutamine for the indicated time period. The culture mediums were changed every two days.

### Histology and IHC assays

Mouse adrenal glands were excised, fixed in formalin, embedded in paraffin, and cut into 4- $\mu$ m-thick sections. Sections were stained with H&E or subjected to sequential incubations with the indicated primary antibodies, biotinylated secondary antibodies and streptavidin-HRP as described before [47–49]. Antibodies used are listed in [S1 Table](#).

### IF analysis

Cells were fixed, permeabilized, and subsequently incubated with Mac-1 antibody, followed by FITC-conjugated secondary antibody. Cells were also counterstained with Hoechst for nuclear staining. Stained proteins and their subcellular localizations were detected using a fluorescence microscope [50].

### RT-qPCR analysis

Mouse adrenal glands were subjected to RNA extraction, RNA reverse transcription and qPCR as described [51–53]. Primers for qPCR are listed in [S2 Table](#).

### Flow cytometry analysis

The indicated cells were fixed with paraformaldehyde (2%) and permeabilized with saponin (0.5%), or directly treated with the indicated antibodies. Data were acquired using

FACSCalibur (BD Biosciences) and analyzed using CellQuest software (Becton Dickinson) as described [54–57]. Antibodies used are listed in [S1 Table](#).

### Statistics

Student's *t* test (2 tailed, unpaired) was used to assess significance of differences between 2 groups. All bars in figures represent mean  $\pm$  SEM. *P* values less than 0.05 and 0.01 were considered statistically significant and highly statistically significant, respectively).

### Supporting information

**S1 Fig. NF- $\kappa$ B1 deletion delayed neurofibroma development in Tax<sup>+</sup> mice.**

(PDF)

**S2 Fig. NF- $\kappa$ B1 deletion has no effect on Tax expression in the spleen and lymph nodes of Tax<sup>+</sup> mice.**

(PDF)

**S1 Table. Antibodies used.**

(PDF)

**S2 Table. Primers used.**

(PDF)

**S1 File.**

(XLSX)

### Acknowledgments

We thank Gutian Xiao for his advice and constructive feedback and Jeffrey E. Green for Tax<sup>+</sup> mice.

### Author Contributions

**Conceptualization:** Xinxin Song, Zhaoxia Qu.

**Data curation:** Xinxin Song.

**Formal analysis:** Xinxin Song, Zhaoxia Qu.

**Funding acquisition:** Zhaoxia Qu.

**Investigation:** Xinxin Song, Zhaoxia Qu.

**Methodology:** Xinxin Song, Zhaoxia Qu.

**Project administration:** Zhaoxia Qu.

**Resources:** Zhaoxia Qu.

**Supervision:** Zhaoxia Qu.

**Validation:** Xinxin Song, Zhaoxia Qu.

**Visualization:** Xinxin Song, Zhaoxia Qu.

**Writing – original draft:** Zhaoxia Qu.

**Writing – review & editing:** Xinxin Song, Zhaoxia Qu.



## References

1. Mohanty S, Harhaj EW. Mechanisms of oncogenesis by HTLV-1 Tax. *Pathogens*. 2020; 9(7):543. <https://doi.org/10.3390/pathogens9070543> PMID: 32645846; PMCID: PMC7399876.
2. Nakaya A, Fujita S, Satake A, Nakanishi T, Azuma Y, Tsubokura Y, et al. Human T-cell leukemia virus type I associated with an increased risk of primary malignant neoplasm. *Mediterr J Hematol Infect Dis*. 2018; 10(1):e2018024. <https://doi.org/10.4084/MJHID.2018.024> PMID: 29755702; PMCID: PMC5937974.
3. Yamaoka S, Tobe T, Hatanaka M. Tax protein of human T-cell leukemia virus type 1 is required for maintenance of the transformed phenotype. *Oncogene*. 1992; 7(3):433–7. PMID: 1549359.
4. Qu Z, Xiao G. Human T-cell lymphotropic virus: a model of NF- $\kappa$ B-associated tumorigenesis. *Viruses*. 2011; 3(6):714–49. <https://doi.org/10.3390/v3060714> PMID: 21743832; PMCID: PMC3131208.
5. Pozzatti R, Vogel J, Jay G. The human T-lymphotropic virus type I tax gene can cooperate with the ras oncogene to induce neoplastic transformation of cells. *Mol Cell Biol*. 1990; 10(1):413–7. <https://doi.org/10.1128/mcb.10.1.413-417.1990> PMID: 2403646; PMCID: PMC360770.
6. Tanaka A, Takahashi C, Yamaoka S, Nosaka T, Maki M, Hatanaka M. Oncogenic transformation by the tax gene of human T-cell leukemia virus type I in vitro. *Proc Natl Acad Sci U S A*. 1990; 87(3):1071–5. <https://doi.org/10.1073/pnas.87.3.1071> PMID: 2300570; PMCID: PMC53412.
7. Grassmann R, Berchtold S, Radant I, Alt M, Fleckenstein B, Sodroski JG, et al. Role of human T-cell leukemia virus type 1 X region proteins in immortalization of primary human lymphocytes in culture. *J Virol*. 1992; 66(7):4570–5. <https://doi.org/10.1128/JVI.66.7.4570-4575.1992> PMID: 1351105; PMCID: PMC241270.
8. Akagi T, Shimotohno K. Proliferative response of Tax1-transduced primary human T cells to anti-CD3 antibody stimulation by an interleukin-2-independent pathway. *J Virol*. 1993; 67(3):1211–7. <https://doi.org/10.1128/JVI.67.3.1211-1217.1993> PMID: 8437212; PMCID: PMC237486.
9. Oka T, Sonobe H, Iwata J, Kubonishi I, Satoh H, Takata M, et al. Phenotypic progression of a rat lymphoid cell line immortalized by human T-cell leukemia virus type 1 to induce lymphoma/leukemia-like disease in rats. *J Virol*. 1992; 66(11):6686–94. <https://doi.org/10.1128/jvi.66.11.6686-6694.1992> PMID: 1404610; PMCID: PMC240164.
10. Akagi T, Ono H, Shimotohno K. Characterization of T cells immortalized by Tax1 of human T-cell leukemia virus type 1. *Blood*. 1995; 86(11):4243–9. PMID: 7492783.
11. Nerenberg M, Hinrichs SH, Reynolds RK, Khoury G, Jay G. The tat gene of human T-lymphotropic virus type 1 induces mesenchymal tumors in transgenic mice. *Science*. 1987; 237(4820):1324–9. <https://doi.org/10.1126/science.2888190> PMID: 2888190.
12. Green JE, Baird AM, Hinrichs SH, Klintworth GK, Jay G. Adrenal medullary tumors and iris proliferation in a transgenic mouse model of neurofibromatosis. *Am J Pathol*. 1992; 140(6):1401–10. PMID: 1605307; PMCID: PMC1886554.
13. Peebles RS, Maliszewski CR, Sato TA, Hanley-Hyde J, Maroulakou IG, Hunziker R, et al. Abnormal B-cell function in HTLV-I-tax transgenic mice. *Oncogene*. 1995; 10(6):1045–51. PMID: 7700628.
14. Grossman WJ, Kimata JT, Wong FH, Zutter M, Ley TJ, Ratner L. Development of leukemia in mice transgenic for the tax gene of human T-cell leukemia virus type I. *Proc Natl Acad Sci U S A*. 1995; 92(4):1057–61. <https://doi.org/10.1073/pnas.92.4.1057> PMID: 7862633; PMCID: PMC42636.
15. Kwon H, Ogle L, Benitez B, Bohuslav J, Montano M, Felsner DW, et al. Lethal cutaneous disease in transgenic mice conditionally expressing type I human T cell leukemia virus Tax. *J Biol Chem*. 2005; 280(42):35713–22. <https://doi.org/10.1074/jbc.M504848200> PMID: 16105841.
16. Swaims AY, Khani F, Zhang Y, Roberts AI, Devadas S, Shi Y, et al. Immune activation induces immortalization of HTLV-1 LTR-Tax transgenic CD4+ T cells. *Blood*. 2010; 116(16):2994–3003. <https://doi.org/10.1182/blood-2009-07-231050> PMID: 20634377; PMCID: PMC2974607.
17. Hasegawa H, Sawa H, Lewis MJ, Orba Y, Sheehy N, Yamamoto Y, et al. Thymus-derived leukemia-lymphoma in mice transgenic for the Tax gene of human T-lymphotropic virus type I. *Nat Med*. 2006; 12(4):466–72. <https://doi.org/10.1038/nm1389> PMID: 16550188.
18. Xiao G, Rabson A, Young W, Qing G, Qu Z. Alternative pathways of NF- $\kappa$ B activation: a double-edged sword in health and disease. *Cytokine Growth Factor Rev*. 2006; 17(4):281–93. <https://doi.org/10.1016/j.cytogfr.2006.04.005> PMID: 16793322.
19. Xiao G, Fu J. NF- $\kappa$ B and cancer: a paradigm of Yin-Yang. *Am J Cancer Res*. 2011; 1(2):192–221. PMID: 21969033; PMCID: PMC3180046.
20. Sun F, Xiao Y, Qu Z. Oncovirus Kaposi sarcoma herpesvirus (KSHV) represses tumor suppressor PDLIM2 to persistently activate nuclear factor  $\kappa$ B (NF- $\kappa$ B) and STAT3 transcription factors for tumorigenesis and tumor maintenance. *J Biol Chem*. 2015; 290(12):7362–8. <https://doi.org/10.1074/jbc.C115.637918> PMID: 25681443; PMCID: PMC4367247.

21. Chen M, Sun F, Han L, Qu Z. KSHV microRNA K1 functions as an oncogene by activating NF- $\kappa$ B/IL-6/STAT3 signaling. *Oncotarget*. 2016; 7(22):33363–33373. PMID: PMC5078101.
22. Harhaj EW, Sun SC. IKK $\gamma$  serves as a docking subunit of the I $\kappa$ B kinase (IKK) and mediates interaction of IKK with the human T-cell leukemia virus Tax protein. *J Biol Chem*. 1999; 274(33):22911–4. <https://doi.org/10.1074/jbc.274.33.22911> PMID: 10438454.
23. Xiao G, Harhaj EW, Sun SC. Domain-specific interaction with the I $\kappa$ B kinase (IKK) regulatory subunit IKK $\gamma$  is an essential step in tax-mediated activation of IKK. *J Biol Chem*. 2000; 275(44):34060–7. <https://doi.org/10.1074/jbc.M002970200> PMID: 10906125.
24. Xiao G, Cvijic ME, Fong A, Harhaj EW, Uhlik MT, Waterfield M, et al. Retroviral oncoprotein Tax induces processing of NF- $\kappa$ B2/p100 in T cells: evidence for the involvement of IKK $\alpha$ . *EMBO J*. 2001; 20(23):6805–15. <https://doi.org/10.1093/emboj/20.23.6805> PMID: 11726516; PMID: PMC125766.
25. Qu Z., Qing G., Rabson A., Xiao G. (2004) Tax deregulation of NF- $\kappa$ B p100 processing involves both  $\beta$ -TrCP-dependent and -independent mechanisms. *J. Biol. Chem.* 279, 44563–44572.
26. Harhaj EW, Good L, Xiao G, Uhlik M, Cvijic ME, Rivera-Walsh I, et al. Somatic mutagenesis studies of NF- $\kappa$ B signaling in human T cells: evidence for an essential role of IKK $\gamma$  in NF- $\kappa$ B activation by T-cell costimulatory signals and HTLV-I Tax protein. *Oncogene*. 2000; 19(11):1448–56. <https://doi.org/10.1038/sj.onc.1203445> PMID: 10723136.
27. Xiao G. NF- $\kappa$ B activation: Tax sumoylation is out, but what about Tax ubiquitination? *Retrovirology*. 2012; 9:78. <https://doi.org/10.1186/1742-4690-9-78> PMID: 23009565; PMID: PMC3470980.
28. Fu J, Qu Z, Yan P, Ishikawa C, Aqeilan RI, Rabson AB, et al. The tumor suppressor gene WWOX links the canonical and noncanonical NF- $\kappa$ B pathways in HTLV-I Tax-mediated tumorigenesis. *Blood*. 2011; 117(5):1652–61. <https://doi.org/10.1182/blood-2010-08-303073> PMID: 21115974; PMID: PMC3318777.
29. Sun F, Qu Z, Xiao Y, Zhou J, Burns TF, Stabile LP, et al. NF- $\kappa$ B1 p105 suppresses lung tumorigenesis through the Tpl2 kinase but independently of its NF- $\kappa$ B function. *Oncogene*. 2016; 35(18):2299–310. <https://doi.org/10.1038/nc.2015.299> PMID: 26300007; PMID: PMC4548811.
30. Rocamonde B, Carcone A, Mahieux R, Dutartre H. HTLV-1 infection of myeloid cells: from transmission to immune alterations. *Retrovirology*. 2019; 16(1):45. <https://doi.org/10.1186/s12977-019-0506-x> PMID: 31870397; PMID: PMC6929313.
31. Koralknik IJ, Lemp JF Jr, Gallo RC, Franchini G. In vitro infection of human macrophages by human T-cell leukemia/lymphotropic virus type I (HTLV-I). *AIDS Res Hum Retroviruses*. 1992; 8(11):1845–9. <https://doi.org/10.1089/aid.1992.8.1845> PMID: 1489573.
32. Koyanagi Y, Itoyama Y, Nakamura N, Takamatsu K, Kira J, Iwamasa T, et al. In vivo infection of human T-cell leukemia virus type I in non-T cells. *Virology*. 1993; 196(1):25–33. <https://doi.org/10.1006/viro.1993.1451> PMID: 8356797.
33. Amorim CF, Souza AS, Diniz AG, Carvalho NB, Santos SB, Carvalho EM. Functional activity of monocytes and macrophages in HTLV-1 infected subjects. *PLoS Negl Trop Dis*. 2014; 8(12):e3399. <https://doi.org/10.1371/journal.pntd.0003399> PMID: 25521499; PMID: PMC4270688.
34. Tomoyose T, Nagasaki A, Uchihara JN, Kinjo S, Sugaya K, Onaga T, et al. Primary adrenal adult T-cell leukemia/lymphoma: a case report and review of the literature. *Am J Hematol*. 2007; 82(8):748–52. <https://doi.org/10.1002/ajh.20856> PMID: 17373678.
35. Suzumiya J, Marutsuka K, Nabeshima K, Nawa Y, Koono M, Tamura K, et al. Autopsy findings in 47 cases of adult T-cell leukemia/lymphoma in Miyazaki prefecture, Japan. *Leuk Lymphoma*. 1993; 11(3–4):281–6. <https://doi.org/10.3109/10428199309087005> PMID: 8260899.
36. Waterfield MR, Zhang M, Norman LP, Sun SC. NF- $\kappa$ B1/p105 regulates lipopolysaccharide-stimulated MAP kinase signaling by governing the stability and function of the Tpl2 kinase. *Mol Cell*. 2003; 11(3):685–94. [https://doi.org/10.1016/s1097-2765\(03\)00070-4](https://doi.org/10.1016/s1097-2765(03)00070-4) PMID: 12667451.
37. Yan P, Fu J, Qu Z, Li S, Tanaka T, Grusby MJ, et al. PDLIM2 suppresses human T-cell leukemia virus type I Tax-mediated tumorigenesis by targeting Tax into the nuclear matrix for proteasomal degradation. *Blood*. 2009; 113(18):4370–80. <https://doi.org/10.1182/blood-2008-10-185660> PMID: 19131544; PMID: PMC2676091.
38. Fu J, Yan P, Li S, Qu Z, Xiao G. Molecular determinants of PDLIM2 in suppressing HTLV-I Tax-mediated tumorigenesis. *Oncogene*. 2010; 29(49):6499–507. <https://doi.org/10.1038/nc.2010.374> PMID: 20838382; PMID: PMC3013277.
39. Sun F, Li L, Yan P, Zhou J, Shapiro SD, Xiao G, et al. Causative role of PDLIM2 epigenetic repression in lung cancer and therapeutic resistance. *Nat Commun*. 2019; 10(1):5324. <https://doi.org/10.1038/s41467-019-13331-x> PMID: 31757943; PMID: PMC6876573.
40. Sun F, Yan P, Xiao Y, Zhang H, Shapiro SD, Xiao G, et al. NanoPDLIM2 enhanced efficacy of PD-1 blockade and chemotherapy in mouse lung cancers. *eLife* 12, RP89638. bioRxiv [Preprint]. 2023 Jul

- 25:2023.07.23.550248. <https://doi.org/10.1101/2023.07.23.550248> PMID: 37546791; PMCID: PMC10402062.
41. Li L, Sun F, Han L, Liu X, Xiao Y, Gregory AD, et al. PDLIM2 repression by ROS in alveolar macrophages promotes lung tumorigenesis. *JCI Insight*. 2021; 6(5):e144394. <https://doi.org/10.1172/jci.insight.144394> PMID: 33539325; PMCID: PMC8021114.
  42. Qu Z, Yan P, Fu J, Jiang J, Grusby MJ, Smithgall TE, et al. DNA methylation-dependent repression of PDZ-LIM domain-containing protein 2 in colon cancer and its role as a potential therapeutic target. *Cancer Res*. 2010; 70(5):1766–72. <https://doi.org/10.1158/0008-5472.CAN-09-3263> PMID: 20145149; PMCID: PMC3003295.
  43. Qu Z, Fu J, Yan P, Hu J, Cheng SY, Xiao G. Epigenetic repression of PDZ-LIM domain-containing protein 2: implications for the biology and treatment of breast cancer. *J Biol Chem*. 2010; 285(16):11786–92. <https://doi.org/10.1074/jbc.M109.086561> PMID: 20185823; PMCID: PMC2852914.
  44. Yan P, Qu Z, Ishikawa C, Mori N, Xiao G. Human T-cell leukemia virus type I-mediated repression of PDZ-LIM domain-containing protein 2 involves DNA methylation but independent of the viral oncoprotein tax. *Neoplasia*. 2009; 11(10):1036–41. <https://doi.org/10.1593/neo.09752> PMID: 19794962; PMCID: PMC2745669.
  45. Qu Z, Fu J, Ma H, Zhou J, Jin M, Mapara MY, et al. PDLIM2 restricts Th1 and Th17 differentiation and prevents autoimmune disease. *Cell Biosci*. 2012; 2(1):23. <https://doi.org/10.1186/2045-3701-2-23> PMID: 22731402; PMCID: PMC3543335.
  46. Guo ZS, Qu Z. PDLIM2: Signaling pathways and functions in cancer suppression and host immunity. *Biochim Biophys Acta Rev Cancer*. 2021; 1876(2):188630. <https://doi.org/10.1016/j.bbcan.2021.188630> PMID: 34571051; PMCID: PMC10291879.
  47. Qu Z, Xiao G. Systematic detection of noncanonical NF- $\kappa$ B activation. *Methods Mol Biol*. 2015; 1280:121–54. [https://doi.org/10.1007/978-1-4939-2422-6\\_8](https://doi.org/10.1007/978-1-4939-2422-6_8) PMID: 25736747.
  48. Sun F, Xiao Y, Shapiro SD, Qu Z, Xiao G. Critical and distinct roles of cell type-specific NF- $\kappa$ B2 in lung cancer. *JCI Insight*. 2024; 9(4):e164188. <https://doi.org/10.1172/jci.insight.164188> PMID: 38385745.
  49. Sun F, Qu Z, Xiao G. Methods to detect NF- $\kappa$ B activity in tumor-associated macrophage (TAM) populations. *Methods Mol Biol*. 2021; 2366:213–41. [https://doi.org/10.1007/978-1-0716-1669-7\\_13](https://doi.org/10.1007/978-1-0716-1669-7_13) PMID: 34236641.
  50. Li L, Han L, Qu Z. NF- $\kappa$ B RelA is a cell-intrinsic metabolic checkpoint restricting glycolysis. *Cell Biosci*. 2024; 14(1):11. <https://doi.org/10.1186/s13578-024-01196-7> PMID: 38245770; PMCID: PMC10799406.
  51. Qing G, Qu Z, Xiao G. Endoproteolytic processing of C-terminally truncated NF- $\kappa$ B2 precursors at  $\kappa$ B-containing promoters. *Proc Natl Acad Sci U S A*. 2007; 104(13):5324–9. <https://doi.org/10.1073/pnas.0609914104> PMID: 17363471; PMCID: PMC1838492.
  52. Zhou J, Qu Z, Yan S, Sun F, Whitsett JA, Shapiro SD, et al. Differential roles of STAT3 in the initiation and growth of lung cancer. *Oncogene*. 2015; 34(29):3804–3814. PMCID: PMC4387125. <https://doi.org/10.1038/onc.2014.318> PMID: 25284582
  53. Qu Z, Sun F, Zhou J, Li L, Shapiro SD, Xiao G. Interleukin-6 prevents the initiation but enhances the progression of lung cancer. *Cancer Research*. 2015; 75(16):3209–3215. PMCID: PMC4537823.
  54. Zhou J, Qu Z, Sun F, Han L, Yan Y, Stabile LP, et al. Myeloid STAT3 promotes lung tumorigenesis by transforming tumor immunosurveillance into tumor-promoting inflammation. *Cancer Immunol. Res*. 2017; 5(3):257–268. PMCID: PMC5334370. <https://doi.org/10.1158/2326-6066.CIR-16-0073> PMID: 28108629
  55. Li L, Han L, Sun F, Zhou J, Ohaegbulam KC, Tang X, et al. NF- $\kappa$ B RelA renders tumor-associated macrophages resistant to and capable of directly suppressing CD8+ T cells for tumor promotion. *Oncoimmunology*. 2018; 7(6):e1435250. PMCID: PMC5980414.
  56. Sun F, Guo ZS, Gregory AD, Shapiro SD, Xiao G, Qu Z. Dual but not single PD-1 or TIM-3 blockade enhances oncolytic virotherapy in refractory lung cancer. *J Immunother Cancer*. 2020; 8(1):e000294. PMCID: PMC7254155. <https://doi.org/10.1136/jitc-2019-000294> PMID: 32461344
  57. Sun F, Li L, Xiao Y, Gregory AD, Shapiro SD, Xiao G, et al. Alveolar macrophages inherently express programmed death-1 ligand 1 for optimal protective immunity and tolerance. *J Immunol*. 2021; 207(1):110–114. <https://doi.org/10.4049/jimmunol.2100046> PMID: 34135059; PMCID: PMC8674373.
